# Supplementary material
Source: Springer Nature journal article supplement (https://www.springerprofessional.de/resource/supplementary/13638_2014_1024_MOESM23_ESM.pdf/11899074)

HIGHER LAYERS

INPUT/OUTPUT LAYER  
( $\Delta P$ , P, CP, NDTr, etc.)

MOBILITY MANAGEMENT LAYER

HANDOVER MANGEMENT LAYER

VANET

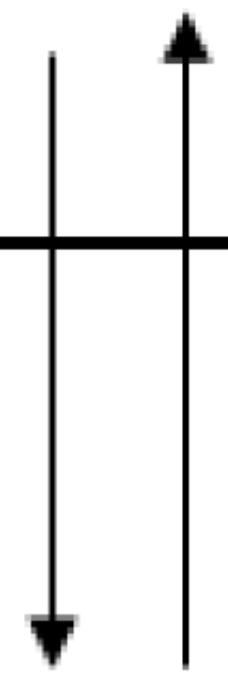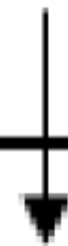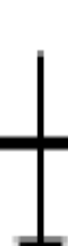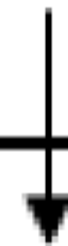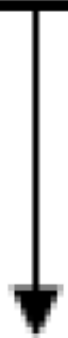

Supplement: MOESM23 [file 11899074]
